# Supplementary material for: pH-Responsive magnetic nanospheres for the reversibly selective capture and release of glycoproteins
Source: Royal Society of Chemistry journal article supplement (doi:10.1039/c6tb02662a), 2017-01-01
Supplement: c6tb02662a1.pdf [file c6tb02662a1.pdf]

Supporting Information for Journal of Materials Chemistry B

# pH-responsive Magnetic Nanospheres for Reversibly Selective Capture and Release of Glycoproteins

Qi Yang, Yue Zhu, Bin Luo, Fang Lan,\* Yao Wu,\* and Zhongwei Gu

National Engineering Research Center for Biomaterials, Sichuan University, Chengdu, 610064, China

\*E-mail: [fanglan@scu.edu.cn](mailto:fanglan@scu.edu.cn) (Fang Lan); [wuyao@scu.edu.cn](mailto:wuyao@scu.edu.cn) (Yao Wu)

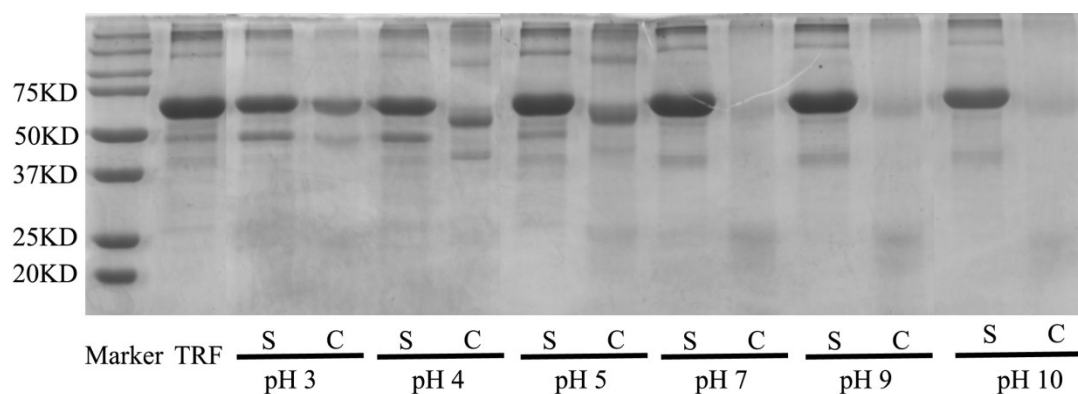

**Fig. S1.** SDS-PAGE analysis of the supernatant (S), protein-nanospheres composites (C) of pure TRF after treatment with  $\text{Fe}_3\text{O}_4/\text{CMCS}/\text{PAAPBA}$  nanospheres at different pH for 1 h. Lane 1, marker; Lane 2, TRF before treatment; Lanes 3~14, supernatant and protein-nanospheres composites after treatment at different pH. ( $C_{\text{Protein}} = 1 \text{ mg/ml}$ , 300  $\mu\text{l}$  protein solution, co-incubation for 1 h)

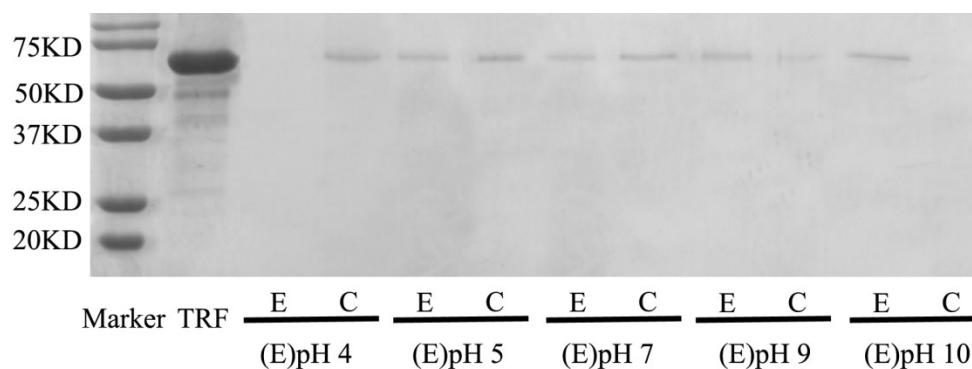

**Fig. S2.** SDS-PAGE analysis of the eluate (E), protein-nanospheres composites (C) of pure TRF after incubation with  $\text{Fe}_3\text{O}_4/\text{CMCS}/\text{PAAPBA}$  nanospheres at pH 4 and elution at different pH. Lane 1, marker; Lane 2, TRF before treatment; Lanes 3~12, eluate and protein-nanospheres composites after elution at different pH. ( $C_{\text{Protein}} = 0.5 \text{ mg/ml}$ , 30  $\mu\text{l}$  protein solution, incubation at pH 4, washing solution of 200  $\mu\text{l}$ )

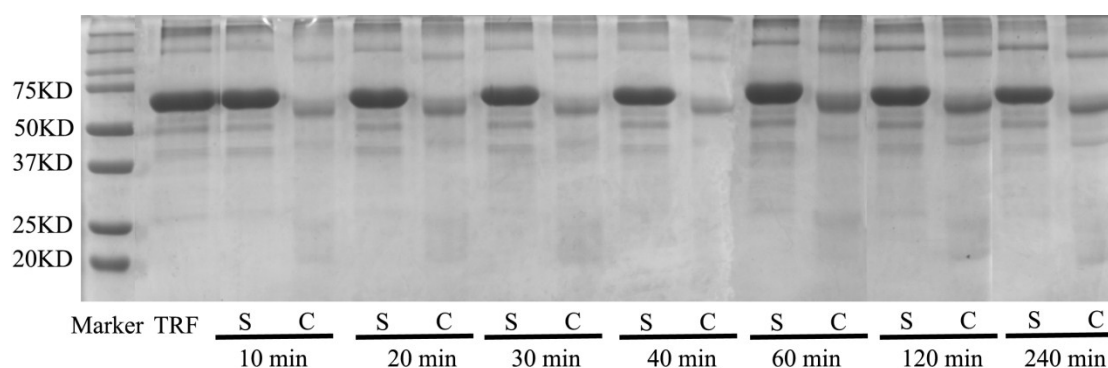

**Fig. S3.** SDS-PAGE analysis of the supernatant (S), protein-nanospheres composites (C) of pure TRF after treatment with Fe<sub>3</sub>O<sub>4</sub>/CMCS/PAAPBA nanospheres at pH 4 with different incubation time. Lane 1, marker; Lane 2, TRF before treatment; Lanes 3~16, supernatant and protein-nanospheres composites after treatment at pH 4 with different incubation time. (C<sub>Protein</sub> =1 mg/ml, 300 μl protein solution, pH 4)

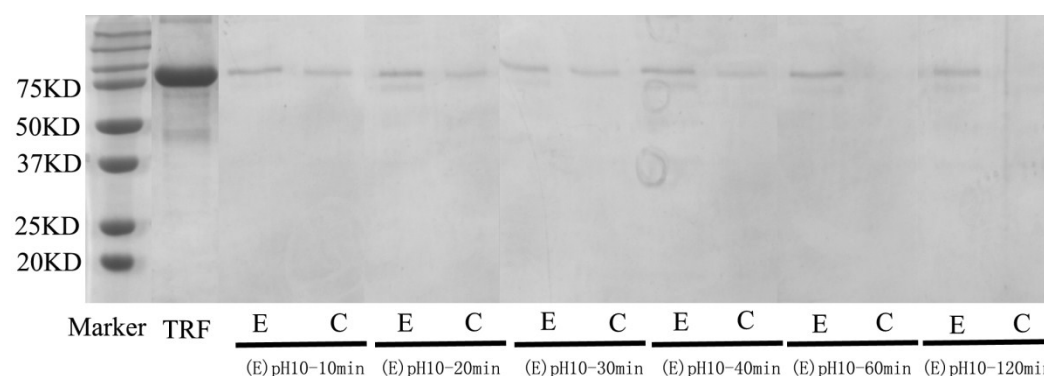

**Fig. S4.** SDS-PAGE analysis of the eluate (E), protein-nanospheres composites (C) of pure TRF after incubation with Fe<sub>3</sub>O<sub>4</sub>/CMCS/PAAPBA nanospheres at pH 4 and eluation at pH 10 with different elution time. Lane 1, marker; Lane 2, TRF before treatment; Lanes 3~14, eluate and protein-nanospheres composites after eluation at different pH. (C<sub>Protein</sub> =0.5 mg/ml, 30 μl protein solution, incubation at pH 4, washing solution of 200 μl)

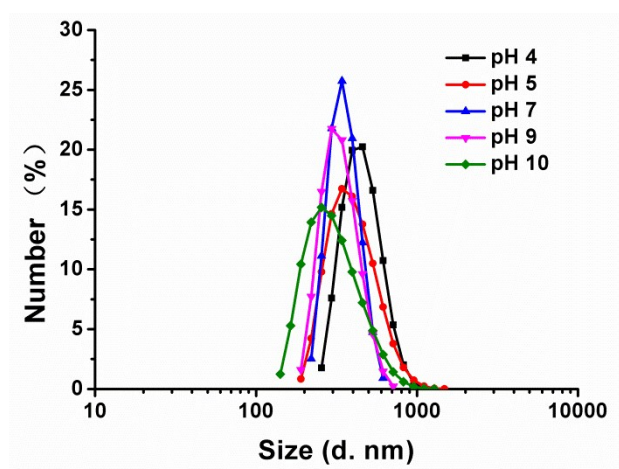

**Fig. S5.** Size distribution of the Fe<sub>3</sub>O<sub>4</sub>/CMCS/PAAPBA nanospheres at different pH media.

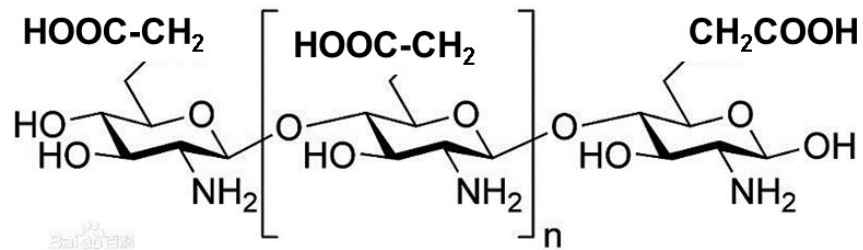

**Fig. S6.** The structure of CMCS.

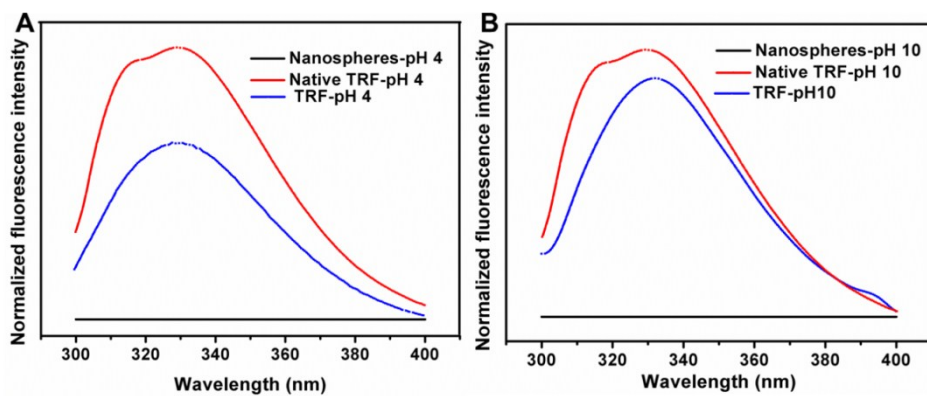

**Fig. S7.** The fluorescence spectra of the nanospheres, native TRF and adsorbed TRF at pH 4 (A) and at pH 10 (B).

**Table S1.** The glycoproteins in 10% FBS and the adsorbed glycoproteins by the nanospheres identified by mass spectrometry.

| Glycoproteins in 10% FBS          |               | Captured Glycoproteins by the Nanospheres            |               |
|-----------------------------------|---------------|------------------------------------------------------|---------------|
| Protein                           | Content (%)   | Protein                                              | Content (%)   |
| Alpha-1-acid glycoprotein         | 1.19%         | Alpha-1-acid glycoprotein                            | 0.55%         |
| Alpha-1B-glycoprotein             | 0.65%         | Alpha-1B-glycoprotein                                | 0.22%         |
| Alpha-2-HS-glycoprotein           | 7.07%         | Alpha-2-HS-glycoprotein                              | 6.31%         |
| Beta-2-glycoprotein               | 0.52%         | Beta-2-glycoprotein                                  | 0.30%         |
| Lactoferrin                       | 0.03%         | Lactoferrin                                          | 0.08%         |
| Leucine-rich alpha-2-glycoprotein | 0.20%         | Leucine-rich alpha-2-glycoprotein                    | 0.15%         |
| Serotransferrin                   | 6.94%         | Serotransferrin                                      | 4.26%         |
|                                   |               | Alpha-fetoprotein                                    | 1.26%         |
|                                   |               | Galectin-3-binding protein                           | 0.06%         |
|                                   |               | Histidine-rich glycoprotein                          | 0.47%         |
|                                   |               | Lipopolysaccharide binding protein                   | 0.11%         |
|                                   |               | Mannose-binding protein C                            | 0.08%         |
|                                   |               | Phosphatidylinositol-glycan-specific phospholipase D | 0.02%         |
|                                   |               | Platelet glycoprotein Ib alpha chain                 | 0.01%         |
| <b>Total</b>                      | <b>16.61%</b> | <b>Total</b>                                         | <b>13.89%</b> |

**Table S2.** The protein list of 10 % FBS identified by mass spectrometry (glycoproteins marked in red).

| Protein                           | Content (%) |
|-----------------------------------|-------------|
| Serum albumin                     | 37.29%      |
| BOVIN ALB protein                 | 13.09%      |
| Alpha-2-HS-glycoprotein           | 7.07%       |
| Serotransferrin                   | 6.94%       |
| Alpha-1-antiproteinase            | 5.72%       |
| Alpha-2-macroglobulin             | 5.68%       |
| Vitamin D-binding protein         | 1.78%       |
| Angiotensinogen                   | 1.63%       |
| Serpin A3-7                       | 1.59%       |
| Trypsin inhibitor                 | 1.59%       |
| Hemopexin                         | 1.43%       |
| Alpha-1-acid glycoprotein         | 1.19%       |
| Serpin A3-3                       | 1.14%       |
| Antithrombin-III                  | 0.81%       |
| Serpin A3-4                       | 0.78%       |
| Fetuin-B                          | 0.67%       |
| Alpha-1B-glycoprotein             | 0.65%       |
| Serpin A3-6                       | 0.63%       |
| Serpin A3-5                       | 0.63%       |
| Pancreatic elastase inhibitor     | 0.56%       |
| Hemoglobin                        | 0.55%       |
| Beta-2-glycoprotein               | 0.52%       |
| Ig gamma-1 chain C region         | 0.46%       |
| Complement C3                     | 0.43%       |
| Pigment epithelium-derived factor | 0.34%       |
| Alpha-2-antiplasmin               | 0.33%       |
| Thyroxine-binding globulin        | 0.32%       |
| Kininogen-2                       | 0.31%       |
| Vitronectin                       | 0.31%       |
| Plasminogen                       | 0.31%       |
| Protein AMBP                      | 0.29%       |
| Kininogen-1                       | 0.28%       |
| KRT6A protein                     | 0.24%       |
| Complement factor B               | 0.23%       |
| Plasma serine protease inhibitor  | 0.21%       |
| Leucine-rich alpha-2-glycoprotein | 0.20%       |
| Lumican                           | 0.20%       |
| Apolipoprotein A-I                | 0.20%       |

|                                                                             |       |
|-----------------------------------------------------------------------------|-------|
| Actin, cytoplasmic 2                                                        | 0.19% |
| Gelsolin                                                                    | 0.15% |
| Serpin A3-8                                                                 | 0.15% |
| SERPIND1 protein                                                            | 0.14% |
| Fibrinogen                                                                  | 0.14% |
| Sex hormone-binding globulin                                                | 0.13% |
| Pantetheinase                                                               | 0.11% |
| Protein Z-dependent protease inhibitor                                      | 0.10% |
| NADH dehydrogenase [ubiquinone] 1 alpha subcomplex subunit                  | 0.10% |
| Prothrombin                                                                 | 0.10% |
| Fibulin-1                                                                   | 0.08% |
| Complement component C9                                                     | 0.07% |
| Inhibitor of carbonic anhydrase                                             | 0.07% |
| Complement factor I                                                         | 0.06% |
| CPN2 protein                                                                | 0.06% |
| Kinetochores-associated protein NSL1-like protein                           | 0.05% |
| Fibroblast growth factor receptor type 1                                    | 0.05% |
| LOC617897 protein                                                           | 0.05% |
| Apoptosis facilitator Bcl-2-like protein 14                                 | 0.05% |
| Complement component C7                                                     | 0.05% |
| Uroplakin-2                                                                 | 0.04% |
| Complement factor H                                                         | 0.04% |
| Regulator of G-protein signaling 10                                         | 0.04% |
| RNA polymerase-associated protein LEO1                                      | 0.04% |
| Alpha-S1-casein                                                             | 0.04% |
| CD5L protein                                                                | 0.03% |
| Lactoferrin                                                                 | 0.03% |
| Acidic mammalian chitinase                                                  | 0.03% |
| Ectonucleotide pyrophosphatase/phosphodiesterase 5 (Putative function)-like | 0.03% |
| Cadherin-5                                                                  | 0.03% |
| Spindle and kinetochores-associated protein 1                               | 0.03% |
| Proteasome subunit alpha type (Fragment)                                    | 0.03% |
| Adipocyte plasma membrane-associated protein                                | 0.03% |
| Zinc finger with UFM1-specific peptidase domain protein                     | 0.03% |
| FAM84B protein                                                              | 0.03% |
| Insulin-like growth factor binding protein acid labile subunit              | 0.03% |
| Olfactory receptor                                                          | 0.03% |
| GRAM domain-containing protein 4                                            | 0.03% |
| C4b-binding protein alpha chain                                             | 0.03% |
| Protein RUFY3                                                               | 0.02% |
| Plasma kallikrein                                                           | 0.02% |

|                                                           |       |
|-----------------------------------------------------------|-------|
| Complement C5a anaphylatoxin                              | 0.02% |
| Transcription initiation protein SPT3-like protein        | 0.02% |
| NDE1 protein                                              | 0.02% |
| Aprataxin                                                 | 0.02% |
| Cartilage oligomeric matrix protein                       | 0.02% |
| Serpin B8                                                 | 0.02% |
| Fibromodulin                                              | 0.02% |
| Thrombospondin-1                                          | 0.02% |
| Corticosteroid-binding globulin                           | 0.02% |
| Rab effector MyRIP                                        | 0.02% |
| Coiled-coil domain-containing protein 121                 | 0.02% |
| Alpha-enolase                                             | 0.02% |
| Vitamin K-dependent protein Z                             | 0.02% |
| Glycerol-3-phosphate acyltransferase 3                    | 0.02% |
| Clusterin                                                 | 0.02% |
| Colony stimulating factor 1 receptor                      | 0.02% |
| Dipeptidyl peptidase 1                                    | 0.02% |
| Coagulation factor IX                                     | 0.02% |
| MUM1 protein                                              | 0.02% |
| Coagulation factor XI                                     | 0.02% |
| Thrombospondin-4                                          | 0.02% |
| Ubiquitin carboxyl-terminal hydrolase                     | 0.02% |
| F-box only protein 3                                      | 0.02% |
| Phospholipid transfer protein                             | 0.02% |
| Alpha-amylase                                             | 0.02% |
| Tubulin-specific chaperone E                              | 0.01% |
| Galectin-3-binding protein                                | 0.01% |
| Tripeptidyl-peptidase 1                                   | 0.01% |
| Protein FAM38B                                            | 0.01% |
| Rhotekin                                                  | 0.01% |
| METTL3 protein                                            | 0.01% |
| Acyl-coenzyme A oxidase                                   | 0.01% |
| Coagulation factor XII                                    | 0.01% |
| Fibronectin                                               | 0.01% |
| KLC1 protein                                              | 0.01% |
| tRNA-dihydrouridine(47) synthase [NAD(P)(+)]              | 0.01% |
| Succinate dehydrogenase [ubiquinone] flavoprotein subunit | 0.01% |
| Ras and EF-hand domain-containing protein                 | 0.01% |
| Ras and EF-hand domain-containing protein                 | 0.01% |
| Acyl-CoA synthetase short-chain family member 3           | 0.01% |
| Vitamin K-dependent protein S                             | 0.01% |



|                                                                                    |       |
|------------------------------------------------------------------------------------|-------|
| Hepatocyte growth factor-like protein                                              | 0.01% |
| Cortactin-binding protein 2                                                        | 0.01% |
| High affinity cAMP-specific and IBMX-insensitive 3',5'-cyclic phosphodiesterase 8B | 0.01% |
| Rho GTPase-activating protein RICH2                                                | 0.01% |
| Protein piccolo                                                                    | 0.01% |
| Kinesin-like protein KIF3C                                                         | 0.01% |
| Ventricular zone-expressed PH domain-containing protein-like protein 1             | 0.01% |
| PDZ domain-containing protein 6                                                    | 0.01% |
| Ionotropic glutamate receptor AMPA 1                                               | 0.01% |
| Hexokinase                                                                         | 0.01% |
| Putative RNA-binding protein 15                                                    | 0.01% |
| LOC507082 protein                                                                  | 0.01% |
| Contactin-1                                                                        | 0.01% |
| Metalloendopeptidase                                                               | 0.01% |
| Hydroxyindole O-methyltransferase                                                  | 0.01% |
| Integrin alpha-2                                                                   | 0.01% |
| Pre-mRNA-splicing factor ATP-dependent RNA helicase PRP16                          | 0.01% |
| E3 ubiquitin-protein ligase NEDD                                                   | 0.01% |
| Regulator of nonsense transcripts 2                                                | 0.01% |
| Aldehyde oxidase                                                                   | 0.01% |
| ATP-dependent RNA helicase DHX29                                                   | 0.01% |
| Microtubule-associated protein 1A                                                  | 0.01% |
| Rap guanine nucleotide exchange factor 2                                           | 0.01% |
| WD repeat-containing protein 87                                                    | 0.01% |
| Sperm flagella 2 protein                                                           | 0.00% |
| Coagulation factor V                                                               | 0.00% |
| Myosin-XVIIIb                                                                      | 0.00% |
| Collagen alpha-5(VI) chain                                                         | 0.00% |
| Neurofibromin                                                                      | 0.00% |
| Sacsin                                                                             | 0.00% |

---

**Table S3.** The list of the absorbed proteins on the Fe<sub>3</sub>O<sub>4</sub>/CMCS/PAAPBA nanospheres incubated with 10% FBS identified by mass spectrometry (glycoproteins marked in red).

| Protein                                         | Content (%) |
|-------------------------------------------------|-------------|
| Serum albumin                                   | 15.54%      |
| Alpha-2-macroglobulin                           | 9.31%       |
| Alpha-2-HS-glycoprotein                         | 6.31%       |
| Apolipoprotein A-I,A-II,A-IV                    | 6.10%       |
| Alpha-1-antiproteinase                          | 4.33%       |
| Serotransferrin                                 | 4.26%       |
| ALB protein                                     | 4.21%       |
| Hemoglobin                                      | 4.11%       |
| Plasminogen                                     | 2.04%       |
| Inter-alpha-trypsin inhibitor heavy chain H1-H4 | 1.78%       |
| Hemopexin                                       | 1.67%       |
| Serum amyloid A protein                         | 1.42%       |
| Prothrombin                                     | 1.36%       |
| Antithrombin-III                                | 1.33%       |
| Alpha-1-antitrypsin transcript variant 1        | 1.27%       |
| Alpha-fetoprotein                               | 1.26%       |
| C4b-binding protein alpha chain                 | 1.18%       |
| Kininogen-1                                     | 1.08%       |
| Factor XIIa inhibitor                           | 0.84%       |
| Ig lambda-1 chain C regions                     | 0.83%       |
| Complement C5                                   | 0.76%       |
| Serum amyloid A-4 protein                       | 0.70%       |
| Complement C3                                   | 0.68%       |
| Angiotensinogen                                 | 0.68%       |
| Endopin 2                                       | 0.63%       |
| SERPIND1 protein                                | 0.61%       |
| Ig gamma-1 chain C region                       | 0.61%       |
| Apolipoprotein E                                | 0.57%       |
| IGL@ protein                                    | 0.56%       |
| Alpha-1-acid glycoprotein                       | 0.55%       |
| Pentaxin                                        | 0.53%       |
| Transthyretin                                   | 0.52%       |
| beta-globin                                     | 0.50%       |
| Histidine-rich glycoprotein                     | 0.47%       |
| Complement component C4                         | 0.47%       |
| Serpin A3-1                                     | 0.45%       |
| Serpin A3-4                                     | 0.42%       |

|                                                 |       |
|-------------------------------------------------|-------|
| Pigment epithelium-derived factor               | 0.42% |
| Complement factor H                             | 0.42% |
| Alpha-2-antiplasmin                             | 0.42% |
| Vitamin D-binding protein                       | 0.41% |
| Serpin A3-7                                     | 0.41% |
| Complement component 5                          | 0.40% |
| Gelsolin                                        | 0.39% |
| Complement C5a anaphylatoxin                    | 0.39% |
| Complement factor B                             | 0.38% |
| Protein AMBP                                    | 0.35% |
| Complement C4                                   | 0.35% |
| Plasma serine protease inhibitor                | 0.33% |
| Ceruloplasmin                                   | 0.33% |
| Beta-2-microglobulin                            | 0.33% |
| Kininogen-2                                     | 0.32% |
| Fetal globin                                    | 0.32% |
| Carboxypeptidase                                | 0.32% |
| Beta-2-glycoprotein                             | 0.30% |
| Vitamin K-dependent protein                     | 0.29% |
| Immunoglobulin light chain, lambda gene cluster | 0.28% |
| Complement component C9                         | 0.28% |
| Complement component C7                         | 0.28% |
| Adiponectin                                     | 0.27% |
| Tetranectin                                     | 0.25% |
| Haptoglobin                                     | 0.25% |
| Similar to vimentin                             | 0.24% |
| Protein Z-dependent protease inhibitor          | 0.24% |
| Fibulin-1                                       | 0.24% |
| LOC790886 protein                               | 0.23% |
| KRT4 protein                                    | 0.22% |
| Inhibitor of carbonic anhydrase                 | 0.22% |
| Apolipoprotein C-III                            | 0.22% |
| Alpha-1B-glycoprotein                           | 0.22% |
| Neutrophil gelatinase-associated lipocalin      | 0.21% |
| Myoglobin                                       | 0.21% |
| Insulin-like growth factor binding protein      | 0.19% |
| Complement component C8                         | 0.19% |
| C-X-C motif chemokine                           | 0.18% |
| Coagulation factor IX                           | 0.18% |
| Ig gamma-3 chain C region                       | 0.17% |
| Hepatocyte growth factor activator              | 0.17% |

|                                                            |       |
|------------------------------------------------------------|-------|
| Fetuin-B                                                   | 0.16% |
| Embryo-specific fibronectin 1 transcript variant           | 0.16% |
| ECM1 protein                                               | 0.16% |
| Corticosteroid-binding globulin                            | 0.16% |
| Complement component C6                                    | 0.16% |
| Clusterin                                                  | 0.16% |
| ApoN protein                                               | 0.16% |
| Apolipoprotein D                                           | 0.16% |
| SLAM family member 9                                       | 0.15% |
| Serpin A3-8                                                | 0.15% |
| Plasma kallikrein                                          | 0.15% |
| Leucine-rich alpha-2-glycoprotein                          | 0.15% |
| Coagulation factor X                                       | 0.15% |
| Primary amine oxidase, liver isozyme                       | 0.13% |
| Lysozyme                                                   | 0.13% |
| Complement C1q subcomponent subunit C                      | 0.13% |
| Complement C1q subcomponent subunit B                      | 0.13% |
| Coagulation factor V                                       | 0.13% |
| C22H3ORF10 protein                                         | 0.13% |
| Ubiquinol-cytochrome-c reductase complex assembly factor 3 | 0.12% |
| L-lactate dehydrogenase                                    | 0.12% |
| Fibrinogen                                                 | 0.12% |
| Alpha-amylase                                              | 0.12% |
| Thrombospondin                                             | 0.11% |
| Pyruvate kinase                                            | 0.11% |
| Protein HP-20-like protein                                 | 0.11% |
| Lipopolysaccharide binding protein                         | 0.11% |
| Cartilage oligomeric matrix protein                        | 0.11% |
| Beta-lactoglobulin                                         | 0.11% |
| Apolipoprotein C-II                                        | 0.11% |
| Thioredoxin                                                | 0.10% |
| Protein HP-25 homolog 1                                    | 0.10% |
| Olfactory receptor                                         | 0.10% |
| Histone H4                                                 | 0.10% |
| Cornifin alpha                                             | 0.10% |
| Apolipoprotein M                                           | 0.10% |
| Alpha-S1-casein                                            | 0.10% |
| Mannose-binding protein C                                  | 0.08% |
| Lactoferrin                                                | 0.08% |
| Histone H2A                                                | 0.08% |
| Fructose-bisphosphate aldolase                             | 0.08% |

|                                                  |       |
|--------------------------------------------------|-------|
| Complement C1s subcomponent                      | 0.08% |
| Annexin                                          | 0.08% |
| Active regulator of SIRT1                        | 0.08% |
| 14-3-3 protein zeta/delta                        | 0.08% |
| Ubiquitin-60S ribosomal protein L40              | 0.07% |
| Tumor necrosis factor                            | 0.07% |
| Tectonic-3                                       | 0.07% |
| Histone H3                                       | 0.07% |
| Cystatin                                         | 0.07% |
| Collectin-43                                     | 0.07% |
| Beta-enolase                                     | 0.07% |
| 5'-nucleotidase, cytosolic III-like              | 0.07% |
| Immunoglobulin J chain                           | 0.06% |
| Hepatocyte growth factor-like protein            | 0.06% |
| Galectin-3-binding protein                       | 0.06% |
| Cathelicidin                                     | 0.06% |
| Arginase-1                                       | 0.06% |
| Triosephosphate isomerase                        | 0.05% |
| Selenoprotein P                                  | 0.05% |
| PRKR-interacting protein 1                       | 0.05% |
| Peroxiredoxin-1                                  | 0.05% |
| Periostin                                        | 0.05% |
| Gamma-glutamylcyclotransferase                   | 0.05% |
| Elongation factor 1-alpha                        | 0.05% |
| Creatine kinase                                  | 0.05% |
| Complement component 1                           | 0.05% |
| Coagulation factor XII                           | 0.05% |
| Coagulation factor XI                            | 0.05% |
| 40S ribosomal protein S3                         | 0.05% |
| Thyroglobulin                                    | 0.04% |
| SUMO-protein ligase NSE2                         | 0.04% |
| Sulfhydryl oxidase                               | 0.04% |
| SLA protein                                      | 0.04% |
| Secreted, acidic, cysteine-rich protein          | 0.04% |
| Reticulocalbin 2, EF-hand calcium binding domain | 0.04% |
| Poly [ADP-ribose] polymerase                     | 0.04% |
| Junction plakoglobin                             | 0.04% |
| Ig kappa chain C region                          | 0.04% |
| Hyaluronan-binding protein 2                     | 0.04% |
| Heat shock protein                               | 0.04% |
| Heat shock cognate 71 kDa protein                | 0.04% |

|                                                                        |       |
|------------------------------------------------------------------------|-------|
| Guanine nucleotide-binding protein G(I)/G(S)/G(T) subunit beta-3       | 0.04% |
| Cadherin-5                                                             | 0.04% |
| VPS33B-interacting protein                                             | 0.02% |
| Vitamin D3 receptor                                                    | 0.02% |
| UPF0544 protein C5orf45 homolog                                        | 0.02% |
| Sperm-associated antigen 16 protein                                    | 0.02% |
| Similar to Protein C11orf33                                            | 0.02% |
| SERPINA11 protein                                                      | 0.02% |
| Serpin H1                                                              | 0.02% |
| Regulator of G-protein-signaling 9                                     | 0.02% |
| Phosphatidylinositol-glycan-specific phospholipase D                   | 0.02% |
| Peripherin                                                             | 0.02% |
| Pancreatic elastase inhibitor                                          | 0.02% |
| Osteomodulin                                                           | 0.02% |
| Myocyte enhancer factor 2D                                             | 0.02% |
| Mitogen-activated protein kinase                                       | 0.02% |
| Interleukin-2 receptor                                                 | 0.02% |
| EGF-containing fibulin-like extracellular matrix protein 1             | 0.02% |
| Desmoglein-1                                                           | 0.02% |
| Cytochrome P450 20A1                                                   | 0.02% |
| CCDC90A protein                                                        | 0.02% |
| Caspase 8                                                              | 0.02% |
| cAMP-dependent protein kinase type I-alpha regulatory subunit          | 0.02% |
| ATP synthase subunit beta                                              | 0.02% |
| Ventricular zone-expressed PH domain-containing protein-like protein 1 | 0.01% |
| WD repeat-containing protein 48                                        | 0.01% |
| Transmembrane protein 63C                                              | 0.01% |
| Transforming growth factor-beta-induced protein ig-h3                  | 0.01% |
| TFIIH basal transcription factor complex helicase XPB subunit          | 0.01% |
| Schlafen family member 12                                              | 0.01% |
| Ribosomal RNA processing protein 1-like protein B                      | 0.01% |
| Protein Shroom2                                                        | 0.01% |
| Platelet glycoprotein Ib alpha chain                                   | 0.01% |
| Phosphatidate phosphatase LPIN2                                        | 0.01% |
| Leucine-rich repeat flightless-interacting protein 1                   | 0.01% |
| Hepatocyte growth factor receptor                                      | 0.01% |
| General vesicular transport factor p115                                | 0.01% |
| FMR1-interacting protein 1                                             | 0.01% |
| Fanconi anemia group A protein                                         | 0.01% |
| E3 ubiquitin-protein ligase Topors                                     | 0.01% |
| Disintegrin and metalloproteinase domain-containing protein 10         | 0.01% |

|                                                      |       |
|------------------------------------------------------|-------|
| Cytochrome b-245 heavy chain                         | 0.01% |
| Collagen, type III, alpha 1                          | 0.01% |
| Coagulation factor XIII, B polypeptide               | 0.01% |
| AT-rich interactive domain-containing protein 5A     | 0.01% |
| Acyl-CoA synthetase long-chain family member 5       | 0.01% |
| Centrosomal protein of 152 kDa                       | 0.01% |
| DNA polymerase                                       | 0.00% |
| Pre-mRNA-processing-splicing factor 8                | 0.00% |
| Alpha-1A subunit calcium channel long splice variant | 0.00% |
| Piezo-type mechanosensitive ion channel component    | 0.00% |
| Fibrillin-1                                          | 0.00% |
| WD repeat-containing protein 87                      | 0.00% |
| Protein furry-like protein                           | 0.00% |
| Cytoplasmic dynein 2 heavy chain 1                   | 0.00% |

---
